# Supplementary material
Source: PubMed Central journal article supplement (PMC6262883)
Supplement: NIHMS992877-supplement-1.pdf [file NIHMS992877-supplement-1.pdf]

# EXPERIMENTAL HEMATOLOGY

## AUTHORSHIP STATEMENT

Please fax this fully signed authorship statement to the Editorial Office of *Experimental Hematology* at +1-314-567-7178

MANUSCRIPT NUMBER: 18-86

TITLE OF ARTICLE: *Epigenetic modification enhances the cytotoxicity of busulfan and 4-hydroperoxycyclophosphamide in AML cells*

- (1) All authors have contributed significantly to the research described in the paper and have read and approved the final manuscript.
- (2) The manuscript is the original work of the authors except for material in the public domain and such excerpts from other works as may be included with the prior written permission of the copyright owners.
- (3) Neither this manuscript nor another manuscript with substantially similar content under our authorship has been published, has been accepted, or is being considered elsewhere for publication except as described in an attachment.
- (4) All affiliations or financial involvement with any entity with a financial interest in the subject matter are completely disclosed and all financial and material support for this research and work are clearly identified in the manuscript.
- (5) All individuals who have contributed significantly to the work reported in this manuscript are acknowledged by name and have granted permission to be named.

| Author Printed Name | Author Signature                                                                     |
|---------------------|--------------------------------------------------------------------------------------|
| Benigno C. Valdez   | 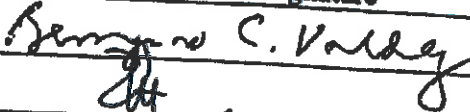 |
| Xaiowen Tang        |   |
| Yang Li             |  |
| David Murray        |  |
| Yan Liu             |  |

**EXPERIMENTAL HEMATOLOGY**  
**AUTHORSHIP STATEMENT Page 2**

MANUSCRIPT NUMBER:

TITLE OF ARTICLE: *Epigenetic modification enhances the cytotoxicity of busulfan and 4-hydroperoxycyclophosphamide in AML cells*

| Author Printed Name (continued) | Author Signature                                                                   |
|---------------------------------|------------------------------------------------------------------------------------|
| Uday Popat                      |  |
| Richard E. Champlin             |  |
| Borje S. Andersson              |  |
|                                 |                                                                                    |
|                                 |                                                                                    |
|                                 |                                                                                    |
|                                 |                                                                                    |
|                                 |                                                                                    |
|                                 |                                                                                    |
|                                 |                                                                                    |
|                                 |                                                                                    |
|                                 |                                                                                    |
|                                 |                                                                                    |
|                                 |                                                                                    |
|                                 |                                                                                    |
|                                 |                                                                                    |
|                                 |                                                                                    |
|                                 |                                                                                    |
|                                 |                                                                                    |
|                                 |                                                                                    |
