# Supplementary material
Source: PubMed Central journal article supplement (PMC6262883)
Supplement: NIHMS992877-supplement-2.pdf [file NIHMS992877-supplement-2.pdf]

**Figure 5.** Effect of DAC on the level of DNMT1 and its chromatin trapping. Cells were exposed to drug(s) for 48 hrs (A and B) or 24 hrs (C) and analyzed by Western blotting for changes in the level of DNA methyltransferases DNMT1 and DNMT3A/3B (A and B) and chromatin-bound DNMT1 (C) as described under Materials and Methods. Results are representatives of two independent experiments. Bu, busulfan; 4HC, 4-hydroperoxycyclophosphamide; DAC, decitabine.

**Figure 6.** Effect of FLT3-ITD status on the response of AML cell lines to cytotoxic drug treatments. Genomic DNA was isolated from FLT3 wild type (KBM3/Bu250<sup>6</sup>, OCI-AML3 and **THP1**) and FLT3-ITD-positive AML cell lines (MV4-11 and MOLM13) and used as template for PCR analysis. PCR products were resolved on 2% agarose gel with ethidium bromide staining (A). The sensitivity of the **five** AML cell lines to Sor was compared by analyzing cell proliferation using MTT assay (B). The cytotoxicity of [Bu+4HC+DAC] in the absence (C) or presence (D) of Sor was determined in FLT3-ITD cells. Drug synergism (E) was analyzed as in Figure 1. Western blot analysis (F) shows increased cleavage of PARP1 and caspase 3 and phosphorylation of H2AX, and decreased levels of FLT3 downstream targets, when Sor was combined with [Bu+4HC+DAC]. The levels of phosphorylated proteins were first normalized to their non-phosphorylated forms, and the ratio of the normalized phosphoprotein level relative to the untreated control was calculated. All cells were exposed to drug(s) for 48 hrs (B-F). Results are representatives of two (A, E, F) or average $\pm$ SD of three (B-D) independent experiments . Bu, busulfan; 4HC, 4-hydroperoxycyclophosphamide; DAC, decitabine; Sor, sorafenib.

## Supplemental Materials

| Table 1. List of primary antibodies, their sources and dilutions |                          |             |            |
|------------------------------------------------------------------|--------------------------|-------------|------------|
| Antigen                                                          | Source/Cat. #            | Clone type* | Dilution** |
| β-ACTIN                                                          | Sigma/A5316              | mAb         | 6000       |
| ATM                                                              | Santa Cruz Biotech/25921 | mAb         | 750        |
| P-ATM (S1981)                                                    | Rockland/200-301-400     | mAb         | 2000       |
| CHK2                                                             | Cell Signaling/2662      | pAb         | 2500       |
| P-CHK2 (S19)                                                     | Cell Signaling/2666      | pAb         | 2500       |
| c-MYC                                                            | Cell Signaling/9402      | pAb         | 2000       |
| Cleaved CASPASE 3                                                | Cell Signaling/9661      | pAb         | 2500       |
| COX IV                                                           | Cell Signaling/4850      | mAb         | 4500       |
| Cytochrome c                                                     | BD Pharm/556433          | mAb         | 2000       |
| DNMT1                                                            | Santa Cruz Biotech/10222 | pAb         | 700        |
| DNMT3A                                                           | Cell Signaling/3598      | mAb         | 3000       |
| DNMT3B                                                           | Santa Cruz Biotech/10236 | pAb         | 700        |
| γ-Histone 2AX                                                    | EMD Millipore/05-636     | mAb         | 3000       |
| Histone 3                                                        | Abcam//1791              | pAb         | 3000       |
| KAP1                                                             | Bethyl Lab/A300-275      | pAb         | 3000       |
| P-KAP1 (S824)                                                    | Cell Signaling/4127      | pAb         | 2000       |
| Nucleoporin                                                      | Santa Cruz Biotech/48373 | mAb         | 700        |
| PARP1                                                            | Santa Cruz Biotech/8007  | mAb         | 1000       |
| P16                                                              | Cell Signaling/4824      | pAb         | 1200       |
| P21                                                              | Upstate Biotech/05-345   | mAb         | 1000       |
| P-P53 (S15)                                                      | Cell Signaling/9284      | pAb         | 2000       |
| P53                                                              | Santa Cruz Biotech/126   | mAb         | 1000       |
| SMAC/DIABLO                                                      | Cell Signaling/2954      | mAb         | 2500       |
| STAT3                                                            | Cell Signaling/9132      | pAb         | 2000       |
| STAT5                                                            | Santa Cruz Biotech/835   | pAb         | 700        |
| P-STAT5 (T694)                                                   | Cell Signaling/9359      | mAb         | 2000       |

\* pAb: polyclonal antibody; used anti-rabbit IgG for secondary antibody from Bio-Rad Lab

mAb: monoclonal antibody; used anti-mouse IgG for secondary antibody from Bio-Rad Lab

mAb-R: rabbit monoclonal antibody

\*\*Fold dilution in PBS with 0.05% Tween 20
